# Supplementary material
Source: PubMed Central journal article supplement (PMC6981039)
Supplement: NIHMS1545128-supplement-1.pdf [file NIHMS1545128-supplement-1.pdf]

**Supplementary data for:**

***"Layer 5 circuits in V1 differentially control visuomotor behavior"***

***Tang L and Higley MJ***

Correspondence to: [m.higley@yale.edu](mailto:m.higley@yale.edu)

**This PDF file includes:**

Figures S1-S5

Table S1

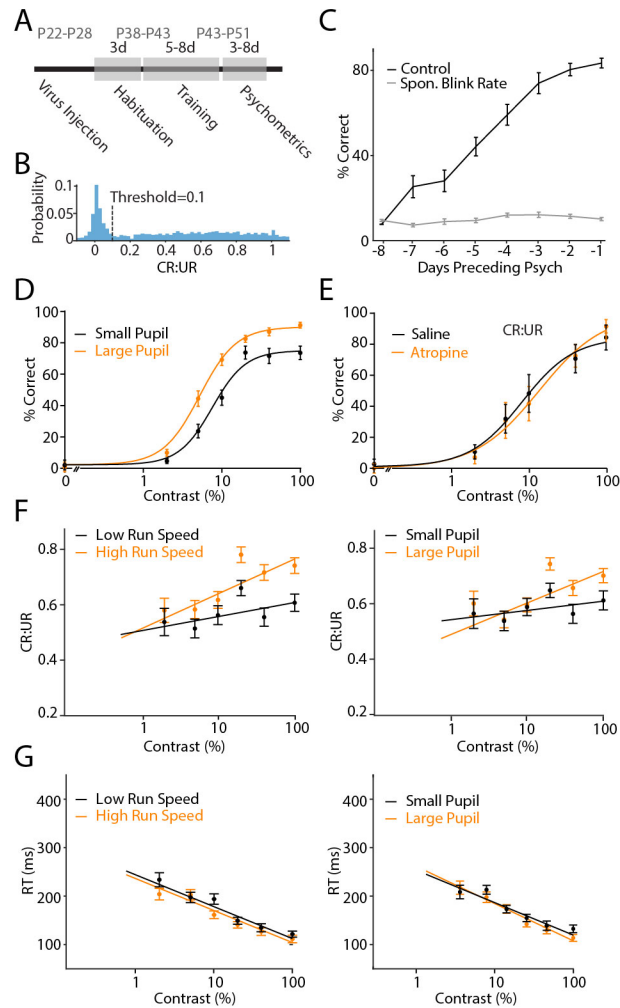

**Figure S1. Behavioral state is correlated with visual task performance (related to Figure 1).**

(A) Timeline of experimental procedures.

(B) Distribution of blink response magnitudes (CR:UR) across all animals, illustrating the cut-off value used to distinguish correct versus incorrect trials.

(C) Learning curve for animals shown in Figure 1, displayed for training days relative to the transition to psychometric testing. The spontaneous blink rate is shown in gray.

(D) Contrast-dependent performance separated into large (orange) and small (black) pupil trials (n=39 mice). Dots and error bars represent average  $\pm$  SEM over mice.  $R_{Max}$ -Large Pupil 85.5%,  $R_{Max}$ -Small Pupil 69.9%;  $p < 0.0001$ , Permutation Test.

(E) Contrast-dependent performance measured 30 minutes after application of saline (black) or atropine (orange) to the eye (n=9 mice). Dots and error bars represent average  $\pm$  SEM over mice.  $R_{Max}$ -Saline 72.4%,  $R_{Max}$ -Atropine 76.0%;  $p = 0.365$ , Permutation Test.

(F) Left, relative amplitude of conditioned blinks (CR:UR) separated into high (orange) and low (black) locomotion speed trials (n=39 mice). Dots and error bars represent average  $\pm$  SEM over mice. Slope-High Speed 0.126, Slope-Low Speed 0.055;  $p = 0.0063$ , Permutation Test. Right, as in left panel for large and small pupil diameter. Slope-Large Pupil 0.115, Slope-Small Pupil 0.038;  $p = 0.0034$ , Permutation Test.

(G) Left, response time (RT) separated by high and low running speed (n=39 mice). Dots and error bars represent average  $\pm$  SEM over mice. Slope-High Speed -0.067, Slope-Low Speed -0.065;  $p = 0.338$ , Permutation Test. Right, as in left panel for large and small pupil diameter. Slope-Large Pupil -0.066, Slope-Small Pupil -0.060;  $p = 0.290$ , Permutation Test.

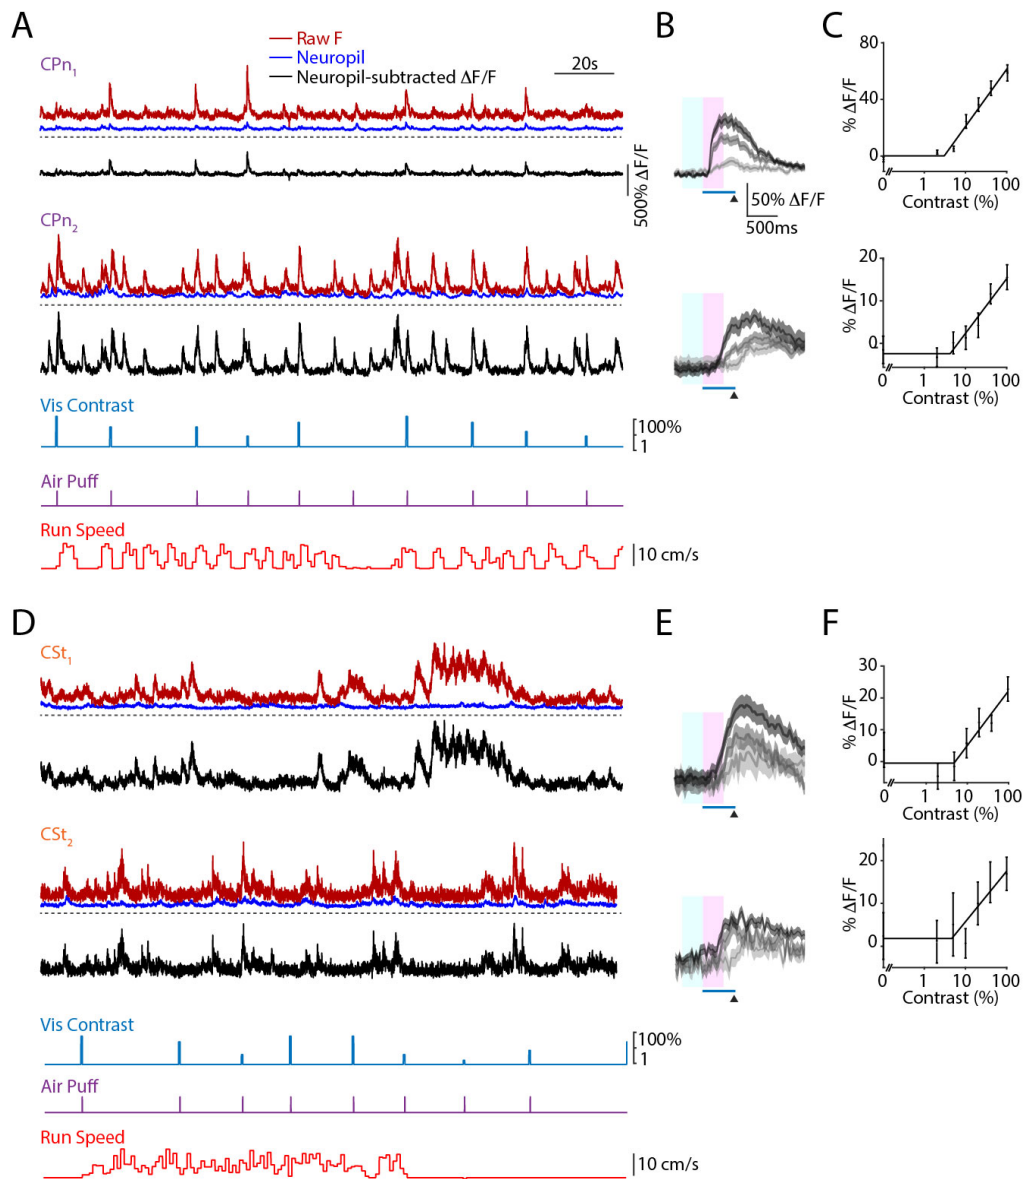

**Figure S2. Example calcium imaging traces and visual responses from CPn and CST neurons (related to Figure. 2).**

(A) Examples of two CPn neurons. Raw fluorescence (red), neuropil fluorescence (blue), and neuropil-subtracted  $\Delta F/F$  (black) are shown for each. Timing for visual stimuli, air puff, and running speed are shown below. Dashed line indicates zero raw fluorescence.

(B) Visual responses at 5%, 20%, and 100% contrast (light, medium, dark gray) for each cell in (A). Timing of visual stimulation (blue bar), air puff (arrowhead), baseline analysis period (light blue window), and response measurement period (pink window) are indicated. Lines and shadings represent average  $\pm$  SEM over trials at each contrast level.

(C) Contrast-dependent response magnitudes for the example neurons, fit with a rectified linear curve. Dots and error bars represent average  $\pm$  SEM over trials at each contrast level.

(D-F) Same as A-C for two example CST neurons.

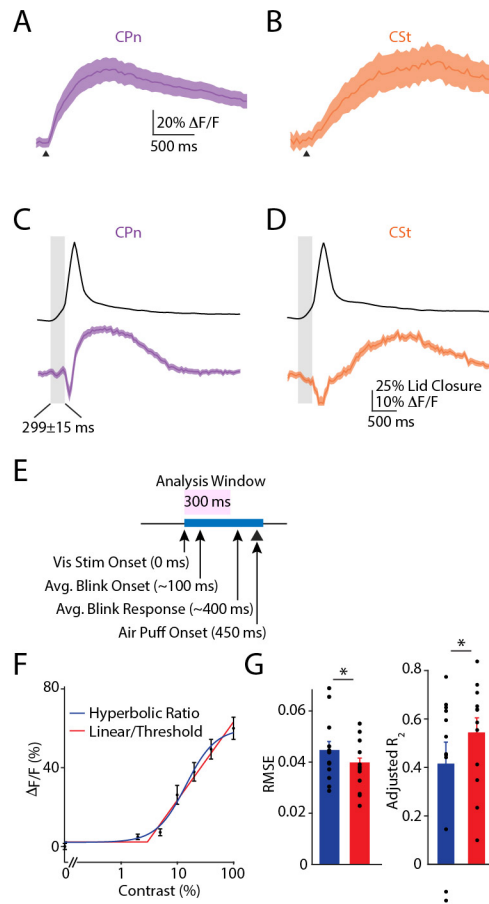

Supplemental Figure 3

**Figure S3. Neuronal calcium transients in response to air puff and spontaneous blinks (related to Figure 3).**

(A) Average  $\pm$  SEM calcium transient (purple with shading) in response to air puff alone across all CPn neurons. Air puff timing indicated by arrowhead.

(B) As in (A) for CSt neurons.

(C) Average lid closure for spontaneously detected blinks (black) and average  $\pm$  SEM calcium transient (purple with shading) for visually-responsive CPn neurons. Period between blink onset and calcium transient onset indicated by gray bar.

(D) As in (C) for CSt neurons.

(E) Schematic showing analysis window for calcium transients on single trials. Data were analyzed for a 300 ms window (pink bar) following visual stimulus onset and ending prior to the blink-dependent response onset.

(F) Example visual responses for a single neuron across multiple contrasts. Data are fit with either a hyperbolic ratio function (blue) or rectified linear function (red). Dots and error bars represent average  $\pm$  SEM over trials.

(G) Left, population root-mean-squared error (RMSE) for the two fitting functions ( $n=204$  cells). Bars represent average  $\pm$  SEM over trials over visually-responsive neurons. Hyperbolic Ratio  $0.044 \pm 0.004$ , Linear/Threshold  $0.038 \pm 0.003$ ;  $n=11$  mice,  $p=0.001$ , Wilcoxon Matched Pairs Test. Right, as in left panel for adjusted  $R^2$ . Hyperbolic Ratio  $0.42 \pm 0.09$ , Linear/Threshold  $0.54 \pm 0.06$ ,  $n=11$  mice;  $p=0.015$ , Wilcoxon Matched Pairs Test.

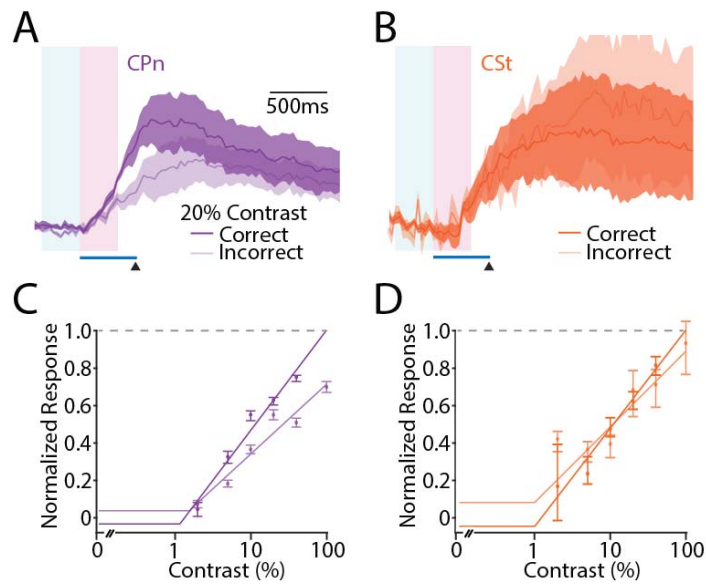

**Figure S4. Comparison of normalized activity in CPn and CSt neurons (related to Figure 4).**

(A-B) Averaged visual responses at 20% contrast for CPn (A) and CSt (B) neurons separated by correct (dark) and incorrect (light) trials. Timing of the visual stimulus (blue bar) and air puff (arrowhead), and analysis windows (baseline, light blue; response, pink) are shown. Lines and shadings represent average  $\pm$  SEM over animals, normalized to the correct response amplitude within animal. Underlying data are the same as in Figure 4A-B.

(C-D) Population contrast-dependent response magnitudes for CPn (C) and CSt (D) neurons separated by correct (dark) and incorrect (light) trials. Dots and error bars represent average  $\pm$  SEM over animals, normalized to the correct response amplitude at 100% contrast within animal. Underlying data are the same as in Figure 4C-D.

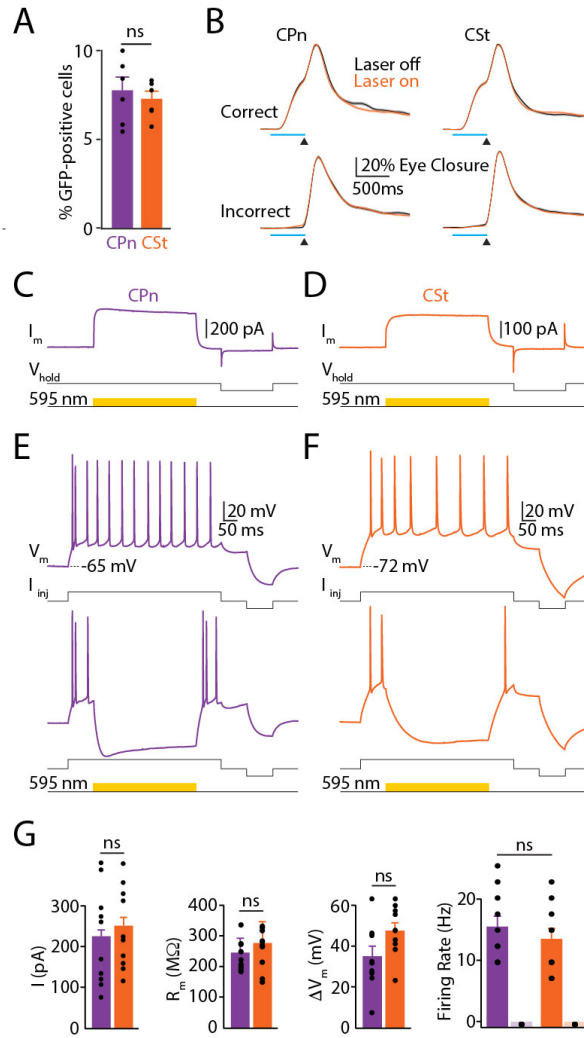

**Figure S5. Functional expression of ArchT does not differ between CPn and CSt populations (related to Figure 5).**

(A) Proportion of NeuN-identified layer 5 neurons expressing ArchT-GFP in either CPn (purple) or CSt (orange) cohorts. Bars represent average  $\pm$  SEM over mice. CPn proportion  $7.76 \pm 0.75\%$ ,  $n=6$  mice; CSt proportion  $7.28 \pm 0.42\%$ ,  $n=6$  mice;  $p=0.589$ , Mann-Whitney U test.

(B) Lid closure traces averaged across contrasts, separated by correct (upper) and incorrect (lower) trials and for laser-off (black) or laser-on (orange) trials, for CPn (left,  $n=11$  mice) and CSt (right,  $n=12$  mice) cohorts. Lines and shadings represent average  $\pm$  SEM over mice.

(C) Example outward current evoked in a CPn neuron voltage clamped at  $-70$  mV by 595 nm light through the objective.

(D) As in (C) for an example CSt neuron.

(E) Example CPn neuron showing action potentials evoked by a depolarizing current pulse alone (upper) or with concurrent illumination with 595 nm light (lower). Spikes are completely suppressed by light.

(F) As in (E) for an example CSt neuron.

(G) Population data for CPn (purple) and CSt cells (orange), showing light-evoked current ( $245 \pm 46.7$  vs.  $276.4 \pm 70.0$  pA,  $p=0.92$ ), resting input resistance ( $225.3 \pm 15.3$  vs.  $251.4 \pm 20.5$  MOhms,  $p=0.32$ ), light-evoked hyperpolarization ( $35.0 \pm 4.9$  vs.  $47.6 \pm 3.8$  mV,  $p=0.078$ ), and suppression of firing rate ( $15.5 \pm 1.7$  vs.  $13.5 \pm 1.7$  Hz,  $p=0.38$ ). Mann-Whitney U Test,  $n=10$  cells per group for all comparisons.

**Table S1. Summary of all statistical analyses (related to Figures 1-5 and S1-S5).**

| Figure          | Comparison                                                                          | Test                        | Statistic A                        | Value A     | Statistic B                              | Value B     | Test statistic | 95% Confidence Interval | p-value |
|-----------------|-------------------------------------------------------------------------------------|-----------------------------|------------------------------------|-------------|------------------------------------------|-------------|----------------|-------------------------|---------|
| <b>Behavior</b> |                                                                                     |                             |                                    |             |                                          |             |                |                         |         |
| Fig.1D          | Muscimol vs. Saline performance (n=11 mice)                                         | Permutation                 | Muscimol Rmax                      | 28.2%       | Saline Rmax                              | 86.5%       | A/B=0.33       | [0.83,1.19]             | <0.0001 |
|                 |                                                                                     | Paired t-test               | Muscimol 100% contrast             | 28.9±5.4%   | Saline 100% contrast                     | 89.3±2.9%   |                |                         | <0.0001 |
| Fig.1F          | High-speed vs. Low-speed performance (n=39 mice)                                    | Permutation                 | High speed Rmax                    | 88.7%       | Low speed Rmax                           | 71.1%       | A/B=1.24       | [0.94,1.10]             | <0.0001 |
|                 |                                                                                     | Paired t-test               | High speed 100% contrast           | 92.1±3.1%   | Low speed at 100% contrast               | 73.1±4.2%   |                |                         | 0.0013  |
| Fig.S1D         | Large pupil vs. Small pupil performance (n=39 mice)                                 | Permutation                 | Large pupil Rmax                   | 85.5%       | Small pupil Rmax                         | 69.9%       | A/B=1.10       | [0.94,1.06]             | <0.0001 |
|                 |                                                                                     | Paired t-test               | Large pupil 100% contrast          | 91.0±1.9%   | Small pupil 100% contrast                | 72.1±4.4%   |                |                         | 0.00011 |
| Fig.S1E         | Atropine vs. Saline performance (n=9 mice)                                          | Permutation                 | Atropine Rmax                      | 76.0%       | Saline Rmax                              | 72.4%       | A/B=1.05       | [0.79,1.27]             | 0.365   |
|                 |                                                                                     | Paired t-test               | Atropine at 100% contrast          | 76.0±7.6%   | Saline at 100% contrast                  | 74.2±8.1%   |                |                         | 0.820   |
| Fig.S1F         | High speed vs. Low speed CR:UR (n=39 mice)                                          | Permutation                 | High speed Slope                   | 0.126       | Low speed Slope                          | 0.055       | A/B=2.31       | [0.54,1.94]             | 0.0063  |
|                 |                                                                                     | Paired t-test               | High speed 100% contrast           | 0.741±0.028 | Low speed 100% contrast                  | 0.607±0.031 |                |                         | <0.0001 |
| Fig.S1F         | Large pupil vs. Small pupil CR:UR (n=39 mice)                                       | Permutation                 | Large pupil Slope                  | 0.115       | Small pupil Slope                        | 0.038       | A/B=3.03       | [0.54,2.11]             | 0.0034  |
|                 |                                                                                     | Paired t-test               | Large pupil 100% contrast          | 0.704±0.026 | Small pupil 100% contrast                | 0.614±0.034 |                |                         | 0.0012  |
| Fig.S1G         | High speed vs. Low speed RT (n=39 mice)                                             | Permutation                 | High speed Slope                   | -0.067      | Low speed Slope                          | -0.065      | A/B=1.03       | [0.71,1.29]             | 0.338   |
|                 |                                                                                     | Paired t-test               | High speed at 100% contrast        | 0.111±0.008 | Low speed at 100% contrast               | 0.122±0.006 |                |                         | 0.230   |
| Fig.S1G         | Large pupil vs. Small pupil RT (n=39 mice)                                          | Permutation                 | Large pupil Slope                  | -0.066      | Small pupil Slope                        | -0.060      | A/B=1.09       | [0.74,1.39]             | 0.290   |
|                 |                                                                                     | Paired t-test               | Large pupil 100% contrast          | 0.114±0.007 | Small pupil 100% contrast                | 0.133±0.008 |                |                         | 0.023   |
| <b>Imaging</b>  |                                                                                     |                             |                                    |             |                                          |             |                |                         |         |
| Fig.S3G         | Linear/threshold vs. hyperbolic ratio fit of contrast response function (n=11 mice) | Wilcoxon Matched Pairs Test | Hyperbolic RMSE                    | 0.044±0.004 | Linear/Threshold RMSE                    | 0.038±0.003 |                |                         | 0.001   |
| Fig.S3G         | Linear/threshold vs. hyperbolic ratio fit of contrast response function (n=11 mice) | Wilcoxon Matched Pairs Test | Hyperbolic Adjusted R <sup>2</sup> | 0.42±0.09   | Linear/Threshold Adjusted R <sup>2</sup> | 0.54±0.06   |                |                         | 0.002   |
| Fig.3B          | CPn vs. CSt visually-responsive neurons (n=6 mice, 449 cells vs. 6 mice, 274 cells) | Mann-Whitney U Test         | CPn % Vis responsive               | 34.9±10.5%  | CSt % Vis responsive                     | 19.5±5.5%   |                |                         | 0.39    |
| Fig.3C          | CPn vs CSt visual response slope (n=6 mice vs. 6 mice)                              | Mann-Whitney U Test         | CPn Slope                          | 0.20±0.06   | CSt Slope                                | 0.10±0.02   |                |                         | 0.016   |
| Fig.3D          | CPn vs. CSt coefficient of variation AUC (n=6 mice vs. 6 mice)                      | Mann-Whitney U Test         | CPn AUC                            | 29.2±3.3    | CSt AUC                                  | 37.9±1.4    |                |                         | 0.0411  |
| Fig.3E          | CPn vs CSt noise correlation (9453 pairs vs. 2145 pairs)                            | Kolmogorov-Smirnov test     | CPn median                         | 0.114       | CSt median                               | 0.072       |                |                         | <0.0001 |
| Fig.3F          | CPn vs CSt locomotion modulation index on CRF Slope (159 cells vs. 51 cells)        | One-sided t-test            | CPn mean                           | 0.36±0.07   | Null                                     | 0           |                |                         | <0.0001 |
|                 |                                                                                     | One-sided t-test            | CSt mean                           | 0.26±0.03   | Null                                     | 0           |                |                         | 0.0038  |
|                 |                                                                                     | t-test                      | CPn mean                           | 0.36±0.07   | CSt mean                                 | 0.26±0.03   |                |                         | 0.120   |
| Fig.4C          | CPn correct vs. incorrect visual response slope (n= 6 mice)                         | Permutation                 | Slope correct                      | 0.16        | Slope incorrect                          | 0.10        | A/B=1.61       | [0.79,1.29]             | 0.0004  |
| Fig.4D          | CSt correct vs. incorrect visual response slope (n=6 mice)                          | Permutation                 | Slope correct                      | 0.12        | Slope incorrect                          | 0.09        | A/B=1.37       | [-0.49,1.68]            | 0.142   |
| Fig.4G (Orig)   | CPn vs. CSt decoder d' (n=6 mice)                                                   | Mann-Whitney U Test         | CPn decoder d'                     | 0.88±0.12   | CSt decoder d'                           | 0.24±0.24   |                |                         | 0.026   |
| Fig.4G (Orig)   | CPn vs. CSt decoder ROC (n=6 mice)                                                  | Mann-Whitney U Test         | CPn decoder ROC                    | 0.70±0.03   | CSt decoder ROC                          | 0.60±0.05   |                |                         | 0.031   |

|                     |                                                                           |                     |                              |            |                              |             |          |             |         |
|---------------------|---------------------------------------------------------------------------|---------------------|------------------------------|------------|------------------------------|-------------|----------|-------------|---------|
| not shown           | CPn vs. CSt decoder d' using adaptive window (n=6 mice)                   | Mann-Whitney U Test | CPn decoder d'               | 0.94±0.31  | CSt decoder d'               | 0.04±0.31   |          |             | 0.002   |
| not shown           | CPn vs. CSt decoder ROC using adaptive window (n=6 mice)                  | Mann-Whitney U Test | CPn decoder ROC              | 0.82±0.07  | CSt decoder ROC              | 0.73±0.06   |          |             | 0.006   |
| Fig.4G (Shuffled)   | CPn vs. CSt decoder d' (n=6 mice)                                         | Mann-Whitney U Test | CPn decoder d'               | 0.75±0.16  | CSt decoder d'               | 0.22±0.25   |          |             | 0.18    |
| Fig.4G (Shuffled)   | CPn vs. CSt decoder ROC (n=6 mice)                                        | Mann-Whitney U Test | CPn decoder ROC              | 0.69±0.04  | CSt decoder ROC              | 0.57±0.06   |          |             | 0.03    |
| Fig.4H              | CPn single neuron decoder d' (n=159 cells)                                | One-sided t-test    | CPn d' mean                  | 0.43±0.03  | CPn chance d'                | -0.01±0.001 |          |             | <0.0001 |
|                     | CSt single neuron decoder d' (n=51 cells)                                 | One-sided t-test    | CSt d' mean                  | 0.09±0.05  | CSt chance d'                | -0.02±0.002 |          |             | 0.088   |
|                     | CPn vs. CSt single neuron decoder d' (n=159 vs. 51 cells)                 | t-test              | CPn d' mean                  | 0.43±0.03  | CSt d' mean                  | 0.09±0.05   |          |             | <0.0001 |
|                     | CPn vs. CSt single neuron decoder d' (n=6 mice)                           | Mann-Whitney U Test | CPn d' animal-wise mean      | 0.37±0.08  | CSt d' animal-wise mean      | -0.012±0.08 |          |             | 0.015   |
| <b>Optogenetics</b> |                                                                           |                     |                              |            |                              |             |          |             |         |
| Fig. S5A            | CPn vs. CSt GFP-positive L5 cells (% NeuN-labeled cells) (n=6 vs 6 mice)  | Mann-Whitney U Test | CPn proportion               | 7.76±0.75% | CSt proportion               | 7.28±0.42%  |          |             | 0.589   |
| Fig.5C              | CPn Laser on vs. Laser off Performance (n=11 mice)                        | Permutation         | Laser on Rmax                | 60.5%      | Laser off Rmax               | 80.2%       | A/B=0.75 | [0.87,1.16] | <0.0001 |
|                     |                                                                           | Paired t-test       | Laser on 100% Contrast       | 63.9±7.3%  | Laser off 100% Contrast      | 79.7±3.5%   |          |             | 0.011   |
| Fig.5D              | CSt Laser on vs. Laser off Performance (n=12 mice)                        | Permutation         | Laser on Rmax                | 79.3%      | Laser off Rmax               | 77.7%       | A/B=1.02 | [0.91,1.09] | 0.325   |
|                     |                                                                           | Paired t-test       | Laser on 100% Contrast       | 85.2±4.6%  | Laser off 100% Contrast      | 80.7±4.6%   |          |             | 0.256   |
| Fig. S5B            | CPn Laser on vs. Laser off UR Amplitude (n=11 mice)                       | Paired t-test       | Laser on UR                  | 0.91±0.02  | Laser off UR                 | 0.89±0.02   |          |             | 0.178   |
|                     | CSt Laser on vs. Laser off UR Amplitude (n=12 mice)                       | Paired t-test       | Laser on UR                  | 0.91±0.01  | Laser off UR                 | 0.92±0.01   |          |             | 0.748   |
| Fig. S5G            | CPn vs. CSt ArchT-evoked current (pA, n=10 vs. 10 cells)                  | Mann-Whitney U Test | CPn current mean             | 245.2±46.7 | CSt current mean             | 276.4±70.0  |          |             | 0.912   |
| Fig. S5G            | CPn vs. CSt Input Resistance (MOhm, n=10 vs. 10 cells)                    | Mann-Whitney U Test | CPn Input resistance mean    | 225.3±15.3 | CSt Input resistance mean    | 251.4±20.5  |          |             | 0.315   |
| Fig. S5G            | CPn vs. CSt ArchT-evoked hyperpolarization (mV, n=10 vs. 10 cells)        | Mann-Whitney U Test | CPn hyperpolarization mean   | 35.0±4.9   | CSt hyperpolarization mean   | 47.6±3.8    |          |             | 0.078   |
| Fig. S5G            | CPn vs. CSt ArchT-evoked reduction in firing rate (Hz, n=10 vs. 10 cells) | Mann-Whitney U Test | CPn reduction in firing rate | 15.5±1.7   | CSt reduction in firing rate | 13.5±1.7    |          |             | 0.376   |
